# Supplementary material for: Postpartum Physical Activity and Weight Retention within One Year: A Prospective Cohort Study in Vietnam
Source: MDPI journal article supplement (doi:10.3390/ijerph17031105), 2020-02-10
Supplement: s1 [file s1]

**Table S1.** Linear regression analyses and GLM with repeated measures of postpartum weight retention in relation to physical activity exposures (n=1617).

| Physical activity at 3-month postpartum (MET-hour/week) | Linear regression analyses                          |          |                                                      |          | GLM with repeated measures                          |          |
|---------------------------------------------------------|-----------------------------------------------------|----------|------------------------------------------------------|----------|-----------------------------------------------------|----------|
|                                                         | Postpartum weight retention at 6-month <sup>a</sup> |          | Postpartum weight retention at 12-month <sup>a</sup> |          | Postpartum weight retention at 6-month <sup>a</sup> |          |
|                                                         | Coefficient (95% CI)                                | <i>p</i> | Coefficient (95% CI)                                 | <i>p</i> | Coefficient (95% CI)                                | <i>p</i> |
| Total physical activity                                 | -0.003 (-0.006, 0.001)                              | 0.118    | -0.003 (-0.007, 0.00004)                             | 0.053    | -0.003 (-0.006, 0.00003)                            | 0.052    |
| Light-intensity                                         | -0.007 (-0.012, -0.001)                             | 0.017    | -0.007 (-0.012, -0.001)                              | 0.017    | -0.007 (-0.012, -0.002)                             | 0.008    |
| Moderate-intensity                                      | 0.001 (-0.005, 0.008)                               | 0.661    | -0.002 (-0.008, 0.005)                               | 0.623    | -0.0001 (-0.006, 0.006)                             | 0.977    |
| Household/caregiving                                    | -0.003 (-0.007, 0.001)                              | 0.131    | -0.004 (-0.008, 0.0004)                              | 0.076    | -0.003 (-0.007, 0.0003)                             | 0.069    |
| Transportation                                          | 0.0003 (-0.02, 0.02)                                | 0.974    | -0.008 (-0.02, 0.01)                                 | 0.329    | -0.004 (-0.019, 0.011)                              | 0.602    |
| Occupational                                            | 0.004 (-0.01, 0.02)                                 | 0.688    | 0.006 (-0.01, 0.02)                                  | 0.496    | 0.01 (-0.01, 0.02)                                  | 0.550    |
| Sports/exercise                                         | -0.11 (-0.38, 0.15)                                 | 0.406    | 0.008 (-0.26, 0.27)                                  | 0.954    | -0.05 (-0.29, 0.19)                                 | 0.668    |

<sup>a</sup> Separate regression models for each physical activity intensity and domain were adjusted for maternal age at enrolment, education, formal employment, parity, pre-pregnancy BMI, mode of delivery, gestational age, gestational weight gain, total energy intake during pregnancy and total physical activity during pregnancy. CI, confidence interval; GLM, general linear model; MET, metabolic equivalent of task.

**Table S2.** Sub-group analyses: Linear regression analyses and GLM of postpartum weight retention in relation to physical activity exposures (n=1617).

| Pre-pregnancy BMI<br>(kg/m <sup>2</sup> ) <sup>b</sup> | Total Physical activity<br>at 3-month postpartum<br>(MET-hour/week) | Linear regression analyses                              |          |                                                          |          | GLM with repeated measures |          |
|--------------------------------------------------------|---------------------------------------------------------------------|---------------------------------------------------------|----------|----------------------------------------------------------|----------|----------------------------|----------|
|                                                        |                                                                     | Postpartum weight retention at 6-<br>month <sup>a</sup> |          | Postpartum weight retention at 12-<br>month <sup>a</sup> |          | 6-month & 12-month         |          |
|                                                        |                                                                     | Coefficient (95% CI)                                    | <i>p</i> | Coefficient (95% CI)                                     | <i>p</i> | Coefficient (95% CI)       | <i>p</i> |
|                                                        |                                                                     | <i>p</i> trend = 0.640                                  |          | <i>p</i> trend = 0.408                                   |          | <i>p</i> trend = 0.455     |          |
| Underweight (< 18.5)<br>(n=421, 26.0%)                 | Low (≤ 133.2)                                                       | Reference                                               |          | Reference                                                |          | Reference                  |          |
|                                                        | Medium (> 133.2 to ≤ 163.3)                                         | 0.09 (-0.67, 0.84)                                      | 0.819    | 0.56 (-0.19, 1.31)                                       | 0.141    | 0.32 (-0.32, 0.97)         | 0.328    |
|                                                        | High (> 163.3)                                                      | -0.21 (-0.99, 0.58)                                     | 0.604    | -0.41 (-1.19, 0.36)                                      | 0.297    | -0.31 (-0.98, 0.36)        | 0.368    |
|                                                        |                                                                     | <i>p</i> trend = 0.0005                                 |          | <i>p</i> trend = 0.0006                                  |          | <i>p</i> trend = 0.0001    |          |
| Normal (18.5-22.9)<br>(n=1018, 63.0%)                  | Low (≤ 133.2)                                                       | Reference                                               |          | Reference                                                |          | Reference                  |          |
|                                                        | Medium (> 133.2 to ≤ 163.3)                                         | -0.34 (-0.87, 0.20)                                     | 0.219    | -0.26 (-0.79, 0.27)                                      | 0.334    | -0.30 (-0.78, 0.18)        | 0.226    |
|                                                        | High (> 163.3)                                                      | -0.99 (-1.54, -0.43)                                    | <0.001   | -0.97 (-1.52, -0.43)                                     | 0.001    | -0.98 (-1.48, -0.48)       | <0.001   |
|                                                        |                                                                     | <i>p</i> trend = 0.007                                  |          | <i>p</i> trend = 0.245                                   |          | <i>p</i> trend = 0.027     |          |
| Overweight and Obese<br>(≥ 23.0)<br>(n=178, 11.0%)     | Low (≤ 133.2)                                                       | Reference                                               |          | Reference                                                |          | Reference                  |          |
|                                                        | Medium (> 133.2 to ≤ 163.3)                                         | 1.23 (-0.32, 2.78)                                      | 0.119    | 0.43 (-1.20, 2.06)                                       | 0.600    | 0.83 (-0.54, 2.20)         | 0.233    |
|                                                        | High (> 163.3)                                                      | 2.03 (0.57, 3.50)                                       | 0.007    | 0.89 (-0.66, 2.44)                                       | 0.257    | 1.46 (0.17, 2.76)          | 0.027    |

<sup>a</sup> Adjusted for maternal age at enrolment, education, formal employment, parity, mode of delivery, gestational age, gestational weight gain, total energy intake during pregnancy, and total physical activity during pregnancy; <sup>b</sup> Cut-offs from World Health Organization for Asian populations; CI, confidence interval; GLM, general linear model; MET, metabolic equivalent of task.
